# Supplementary material for: Temperature effect on extracellular polymeric substances (EPS) and phosphorus accumulating organisms (PAOs) for phosphorus release of anaerobic sludge
Source: Royal Society of Chemistry journal article supplement (doi:10.1039/c8ra10048a), 2019-01-01
Supplement: c8ra10048a1.pdf [file c8ra10048a1.pdf]

## Supplementary materials

Table S1 Chemical shifts and relatively peak areas of different-species phosphorus in the  $^{31}\text{P}$ -NMR spectra at different temperatures

|      | Ortho-P              |               | Monoesters-P         |               | Diesters-P           |               | Pyro-P               |               |
|------|----------------------|---------------|----------------------|---------------|----------------------|---------------|----------------------|---------------|
|      | Chemical shift (ppm) | Peak area (%) | Chemical shift (ppm) | Peak area (%) | Chemical shift (ppm) | Peak area (%) | Chemical shift (ppm) | Peak area (%) |
| 5°C  | 5.68                 | 42.3          | 4.16                 | 3.4           | -2.05                | 1.3           | -5.01                | 3.5           |
| 15°C | 5.48                 | 45.05         | -                    | -             | -                    | -             | -5.01                | 2.48          |
| 25°C | 5.71                 | 55.04         | -                    | -             | -                    | -             | -5.01                | 14.23         |
| 35°C | 5.48                 | 30.2          | -                    | -             | -                    | -             | -5.01                | 3.6           |

  

|      | End groups of poly-P |               | Middle groups of poly-P |               | Average chain length of poly-P |
|------|----------------------|---------------|-------------------------|---------------|--------------------------------|
|      | Chemical shift (ppm) | Peak area (%) | Chemical shift (ppm)    | Peak area (%) |                                |
| 5°C  | -4.37                | 10.3          | -19.38                  | 39.2          | 9.6                            |
|      |                      |               | -20.90                  |               |                                |
| 15°C | -4.51                | 5.67          | -18.89                  | 46.8          | 18.51                          |
|      | -4.57                |               | -18.93                  |               |                                |
|      |                      |               | -19.53                  |               |                                |
|      |                      |               | -20.90                  |               |                                |
| 25°C | -4.37                | 6.86          | -18.53                  | 23.87         | 8.96                           |
|      | -4.51                |               | -18.89                  |               |                                |
|      |                      |               | -18.93                  |               |                                |
| 35°C | -4.46                | 20.6          |                         | 45.6          | 6.43                           |
|      | -4.53                |               |                         |               |                                |

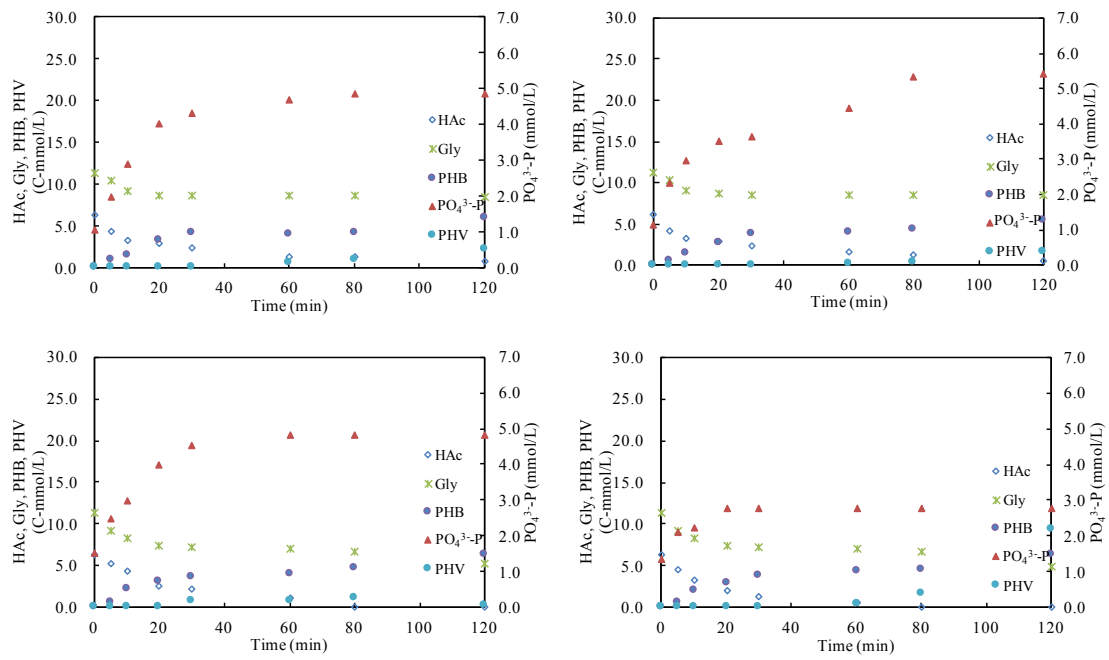

Fig. S1 Changes of TP concentration and distribution in anaerobic sludge at different temperatures
